# Supplementary material for: Evolution and Creationism in America's Classrooms: A National Portrait
Source: PLOS journal article supplement (doi:10.1371/journal.pbio.0060124), 2008-05-14
Supplement: S5 (10.1371/journal.pbio.0060124.s005) [file journal.pbio.0060124.s005]

Table S5. Hours devoted to human evolution and general evolution (combined), by expressed personal beliefs about human origins (N=859)

| Which of the following statements comes closest to your view?                                         | Mean hours of class devoted to general and human evolution | N   |
|-------------------------------------------------------------------------------------------------------|------------------------------------------------------------|-----|
| Human beings have developed over millions of years but God had no part in this process                | 16.9                                                       | 444 |
| Human beings have developed over million but God guided this process                                  | 13.4                                                       | 265 |
| God created human beings pretty much in their present form at one time in the last 10,000 years or so | 9.6                                                        | 150 |
